# Supplementary material for: Artificial Blood for Dogs
Source: PubMed Central journal article supplement (PMC5103191; doi:10.1038/srep36782), 2016-11-10
Supplement: srep36782-s1.pdf [file srep36782-s1.pdf]

Supplementary Information

## Artificial Blood for Dogs

Kana Yamada<sup>1</sup>, Kyoko Yokomaku<sup>1</sup>, Moeka Kureishi<sup>1</sup>, Motofusa Akiyama<sup>1</sup>, Kiyohito Kihira<sup>2</sup> & Teruyuki Komatsu<sup>1</sup>

<sup>1</sup> Department of Applied Chemistry, Faculty of Science and Engineering, Chuo University, 1-13-27 Kasuga, Bunkyo-ku, Tokyo 112-8551, Japan

<sup>2</sup> JEM Utilization Center, Human Spaceflight Technology Directorate, Japan Aerospace Exploration Agency (JAXA), 2-1-1 Sengen, Tsukuba-shi, Ibaraki 305-8505, Japan

Correspondence and requests for materials should be addressed to T.K. (e-mail: komatsu@kc.chuo-u.ac.jp)

## Methods

**Purification of Native CSA from Canine Plasma.** Canine plasma was kindly provided from Kyoritsu Seiyaku Corp. To dissolve the frozen plasma, the sample was incubated in a refrigerator overnight at 4 °C. Then the plasma was centrifuged ( $10,000 \times g$ , 4 °C) to remove the cryoprecipitate. The supernatant was brought to 50% saturation with ammonium sulfate at 25 °C. After leaving for 30 min at 4 °C, the solution was centrifuged ( $10,000 \times g$ , 4 °C) and the supernatant was filtered using a membrane filter (DISMIC-25CS, 0.2  $\mu\text{m}$  pore; Toyo Roshi Kaisha Ltd.). The obtained solution including CSA was dialyzed against deionized water at 4 °C. Then 11% volume of 500 mM sodium phosphate (pH 6.8) was added. The resultant solution in 50 mM sodium phosphate (pH 7.0) was filtered using a membrane filter (C020A047A, 0.2  $\mu\text{m}$  pore; Toyo Roshi Kaisha Ltd.).

Next, the sample was loaded onto an affinity chromatography with a Toyopearl AF-Blue HC-650M (Tosoh Corp.) column. After washing with five-bed volumes of 50 mM sodium phosphate (pH 7.0), CSA was eluted with 50 mM sodium phosphate (pH 7.4) containing 3 M NaCl. The eluent was dialyzed against deionized water at 4 °C. Thereafter, 25% volume of 100 mM Tris-HCl (pH 8.0) was added. The resulting 20 mM Tris-HCl solution (pH 8.0) of CSA was filtered using a membrane filter (C020A047A, 0.2  $\mu\text{m}$  pore). Then the sample was applied to anion exchange chromatography with a Q Sepharose Fast Flow (GE Healthcare UK Ltd.) column using 20 mM Tris-HCl (pH 8.0) as the running buffer. After washing with five-bed volumes of 20 mM Tris-HCl (pH 8.0) containing 100 mM NaCl, elution of CSA was performed with 20 mM Tris-HCl (pH 8.0) containing 300 mM NaCl. The eluent was dialyzed against deionized water at 4 °C, followed by addition of 11% volume of  $10\times$  phosphate-buffered saline (PBS, pH 7.4). Finally, the CSA solution was concentrated to 30 mL using an ultraholder (Advantec UHP-76K; Toyo Roshi Kaisha Ltd.) with an ultrafilter (Advantec Q0100, 10 kDa MWCO; Toyo Roshi Kaisha Ltd.), and was sterilized with a membrane filter (DISMIC-25CS, 0.2  $\mu\text{m}$  pore). All the purification processes were followed by SDS-PAGE analysis. The concentration of CSA was measured using a protein assay kit (Pierce 660 nm; Thermo Fisher Scientific K.K.). The cysteinyl thiol assay of CSA was performed by reaction with 4,4'-dithiopyridine (4,4'-DTP), which binds sulfhydryl group of the protein to generate 4-thiopyridinone ( $\lambda_{\text{max}}$ : 324 nm)<sup>50</sup>.

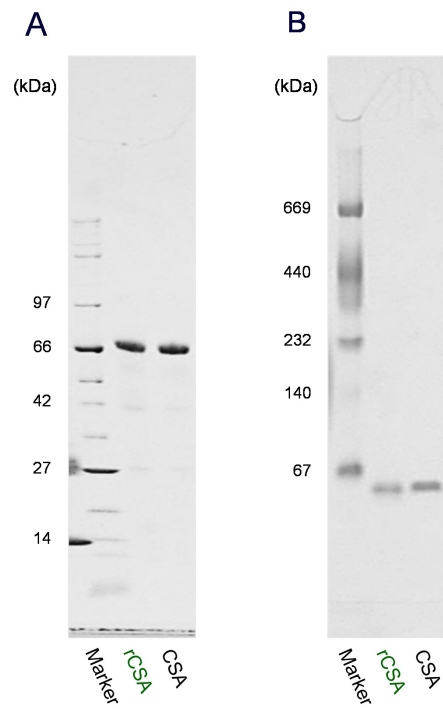

**Figure S1. Full-length gel images corresponding to cropped images in Figure 1A (SDS-PAGE) and 1B (Native-Page).**

|     |                   |                   |                   |                    |                    |
|-----|-------------------|-------------------|-------------------|--------------------|--------------------|
| CSA | 1<br>EAYKSEIAHR   | 11<br>YNDLGEEHFR  | 21<br>GLVLVAFSQY  | 31<br>LQQCPFEDHV   | 41<br>KLAKEVTEFA   |
| HSA | DAHKSEVAHR        | FKDLGEENFK        | ALVLIIFAQY        | LQQCPFEDHV         | KLVNEVTEFA         |
|     | 51<br>KACMAESGA   | 61<br>NCDKSLHTLF  | 71<br>GDKLCTVASL  | 81<br>RDYGDMA DC   | 91<br>CKQEPDRNE    |
|     | KTCVADESAE        | NCDKSLHTLF        | GDKLCTVATL        | RETYGEMADC         | CAKQEPDRNE         |
|     | 101<br>CFLAHKDDNP | 111<br>GPELVAPEP  | 121<br>DALCAAFQDN | 131<br>EDIFLKKYLY  | 141<br>EIARRHPYFY  |
|     | CFLQHKDDNP        | NLPRLVRPEV        | DVMCTAFHDN        | EETFLKKYLY         | EIARRHPYFY         |
|     | 151<br>APELLKYADG | 161<br>YKLVFSECCQ | 171<br>AADKAACLLP | 181<br>KTEALREKVL  | 191<br>ASSAKRRLKC  |
|     | APELLFFAKR        | YKAAFTECCQ        | AADKAACLLP        | KLDELRLDEGK        | ASSAKQRLKC         |
|     | 201<br>ASLQKFGDRA | 211<br>FKAWSVARLS | 221<br>QRFPKADFAE | 231<br>ISKVVTDLTK  | 241<br>VHECCHGDL   |
|     | ASLQKFGERA        | FKAWAVARLS        | QRFPKAEFAE        | VSKLVTDLTK         | VHECCHGDL          |
|     | 251<br>LECADDRADL | 261<br>AKYMCENQDS | 271<br>ISTKLKECCD | 281<br>KPVLEKSOCL  | 291<br>AEVERDEHPG  |
|     | LECADDRADL        | AKYICENQDS        | ISSKLKECCE        | KPLLEKSHCI         | AEVENDEMPA         |
|     | 301<br>DLPSLAADFV | 311<br>EDKEVCKNYC | 321<br>EAKDVFLGTF | 331<br>LYEYARRHPE  | 341<br>YSVSLLLRLA  |
|     | DLPSLAADFV        | ESKDVCKNYA        | EAKDVFLGMF        | LYEYARRHPD         | YSVVLLRLA          |
|     | 351<br>KTYETLEKC  | 361<br>CATDDPPTCY | 371<br>AKVLEDFKPL | 381<br>VEEPQNLVKT  | 391<br>NCELFEKLG E |
|     | KTYETLEKC         | CAAADPHECY        | AKVLEDFKPL        | VEEPQNLIKQ         | NCELFEQLGE         |
|     | 401<br>YGFQNALVR  | 411<br>YTKKAPQVST | 421<br>PTLVEVSRKL | 431<br>GKVGTKCCKK  | 441<br>PESERMSCAE  |
|     | YKFQNALVR         | YTKKVQVST         | PTLVEVSRNL        | GKVGSKCCKH         | PEAKRMPCAE         |
|     | 451<br>DFLSVVLNRL | 461<br>CVLHEKTPVS | 471<br>ERVTKCCSES | 481<br>LVNRRPCFSG  | 491<br>LEVDETYVPK  |
|     | DLSVVLNQL         | CVLHEKTPVS        | DRVTKCCTES        | LVNRRPCFSA         | LEVDETYVPK         |
|     | 501<br>EFNAETFTFH | 511<br>ADLCTLPEAE | 521<br>KQVKKQTALV | 531<br>ELVKKHKPKAT | 541<br>DEQLKIVMGD  |
|     | EFNAETFTFH        | ADLCTLSEKE        | RQIKKQTALV        | ELVKKHKPKAT        | KEQLKAVMDD         |
|     | 551<br>FGAFVEKCCA | 561<br>AENKEGCFSE | 571<br>EGEKLVAASQ | 581<br>AALV        |                    |
|     | FAAFVEKCK         | ADDKETCFAE        | EGKLVAAASQ        | AALGL              |                    |

**Figure S2. Comparison of amino acid sequences of CSA and HSA.** The first row represents CSA sequence (colors correspond to the subdomain colors in Fig. 2A) and the second row represents HSA sequence (black)<sup>33</sup>. The yellow-marked amino acids are different kind pairs between CSA and HSA. The homology of these proteins is 79.8%.

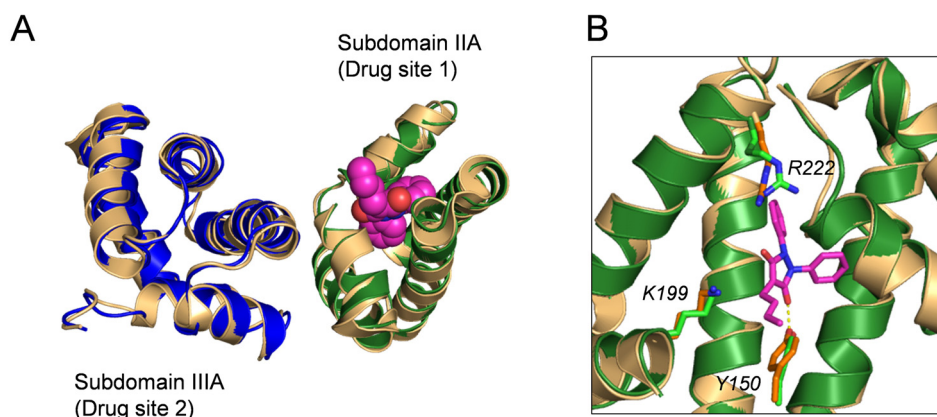

**Figure S3. Superposition of crystal structures of rCSA and HSA-phenylbutazone (PBZ) complex.** (A) Subdomain IIA (drug site 1: forest) and subdomain IIIA (drug site 2: blue) of rCSA are almost the same structures to the corresponding subdomains of HSA-PBZ complex (PDB ID: 2BXC, light orange)<sup>38</sup>. PBZ is depicted in space-filling representation and colored in light magenta. (B) PBZ (light magenta) bound in the hydrophobic pocket of drug site 1 of HSA (light orange) (PDB ID: 2BXC). The PBZ forms a hydrogen bond with Tyr-150 of subdomain IB. Lys-199 and Arg-222 may form weak interactions with PBZ through water molecule. The  $\alpha$ -helices of rCSA is colored in forest. The positions and orientations of the amino acid residues (Y150, K199, R222) of HSA (orange) and rCSA (green) are almost identical.

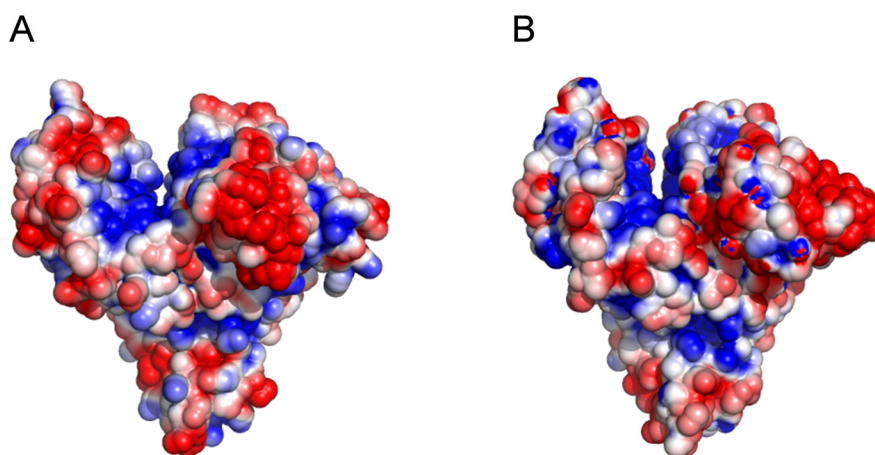

**Figure S4. Surface electrostatic potential representations of (A) rCSA and (B) HSA.** Blue and red respectively represent positive charge and negative charge density. Calculations were carried out using Adaptive Poisson-Boltzmann Solver (APBS) and PyMOL. The pdb files were converted to pqr files for APBS electrostatics calculations by PDB2PQR service<sup>S1</sup>. PDB ID of HSA: 1E78<sup>36</sup>.

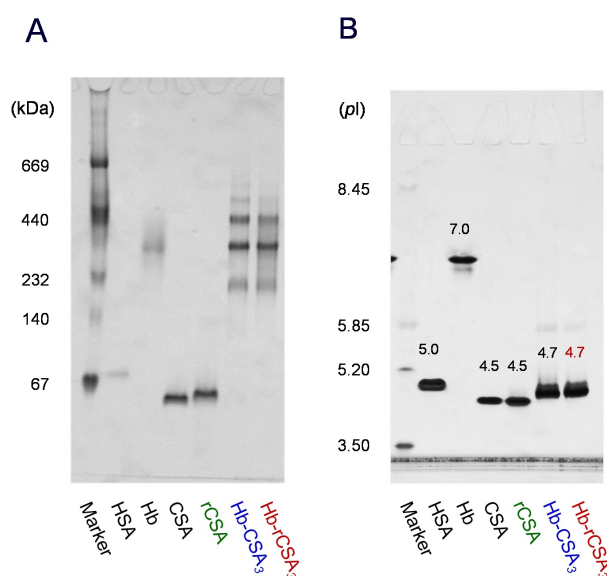

**Figure S5. Full-length gel images corresponding to cropped images in Figure 4B (Native-PAGE) and 4D (IEF).**

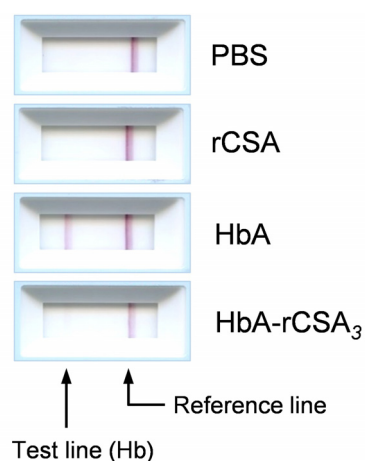

**Figure S6. Immunological reactivity against anti-HbA antibody.** The result of quick chaser occult blood test kit. Appearance of a red test-line indicates the immunological activity to anti-HbA antibody.

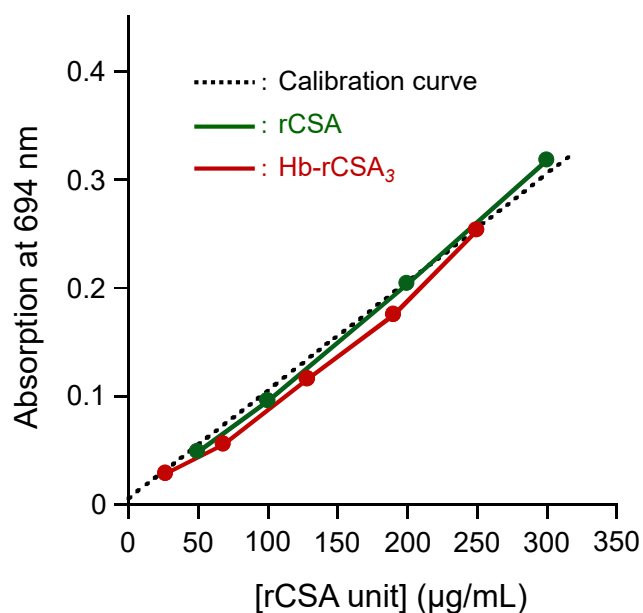

**Figure S7. Immunological reactivity against anti-CSA antibody.** The relation between CSA unit concentration of the sample and absorption intensity of the reactant solution at 694 nm. The dotted line is calibration curve prepared using CSA standard.

**Table S1. X-ray crystallography data collection and refinement statistics of rCSA**

---

|                            |                                                                                                                                                   |
|----------------------------|---------------------------------------------------------------------------------------------------------------------------------------------------|
| Wavelength (Å)             | 1.0000                                                                                                                                            |
| Resolution range (Å)       | 34.84–3.0 (3.05–3.0)                                                                                                                              |
| Space group                | P 1 21 1                                                                                                                                          |
| Cell dimensions            | $a = 46.72 \text{ \AA}$ , $b = 118.4 \text{ \AA}$ , $c = 58.33 \text{ \AA}$<br>$\alpha = 90^\circ$ , $\beta = 114.82^\circ$ , $\gamma = 90^\circ$ |
| Total reflections          | 77559                                                                                                                                             |
| Unique reflections         | 11596 (577)                                                                                                                                       |
| Multiplicity               | 6.7 (6.0)                                                                                                                                         |
| Completeness (%)           | 99.9 (99.8)                                                                                                                                       |
| Mean I/sigma (I)           | 30.3 (6.6)                                                                                                                                        |
| B-factor (Å <sup>2</sup> ) | 48.12                                                                                                                                             |
| R-merge                    | 0.110 (0.453)                                                                                                                                     |
| Mosaicity Range (°)        | 1.25–1.98                                                                                                                                         |
| <b>Refinement</b>          |                                                                                                                                                   |
| Resolution range (Å)       | 34.84–3.2 (3.315–3.2)                                                                                                                             |
| No. reflections            | 9425 (948)                                                                                                                                        |
| R-work                     | 0.2530 (0.3006)                                                                                                                                   |
| R-free                     | 0.2916 (0.3322)                                                                                                                                   |
| No. non-hydrogen atoms     | 4424                                                                                                                                              |
| Macromolecules             | 4424                                                                                                                                              |
| RMS (bonds)                | 0.008                                                                                                                                             |
| RMS (angles)               | 0.87                                                                                                                                              |
| Ramachandran favored (%)   | 90                                                                                                                                                |
| Ramachandran outliers (%)  | 1.6                                                                                                                                               |
| Clashscore                 | 9.47                                                                                                                                              |
| Average B-factor           | 47.80                                                                                                                                             |

---

Statistics for the highest-resolution shell are shown in parentheses.



**Table S2. UV-vis absorption spectral data of Hb-rCSA<sub>3</sub> and Hb-CSA<sub>3</sub> clusters in PBS solution (pH 7.4) at 25 °C**

| Hemoproteins         | $\lambda_{\max}$ (nm) |               |               |
|----------------------|-----------------------|---------------|---------------|
|                      | deoxy                 | oxy           | carbonyl      |
| Hb-rCSA <sub>3</sub> | 429, 556              | 414, 541, 577 | 419, 538, 569 |
| Hb-CSA <sub>3</sub>  | 429, 556              | 414, 541, 577 | 420, 538, 569 |
| Hb-HSA <sub>3</sub>  | 430, 556              | 413, 541, 577 | 420, 538, 569 |
| Hb <sup>†</sup>      | 430, 555              | 414, 541, 577 | 420, 538, 569 |
| HbA <sup>‡</sup>     | 430, 555              | 415, 541, 577 | 419, 540, 569 |

<sup>†</sup> From ref. 29. <sup>‡</sup> Ref. 40.

## Reference

- S1. Dolinsky, T. J., Nielsen, J. E, McCammon, J. A. & Baker, N. A. PDB2PQR: an automated pipeline for the setup, execution, and analysis of Poisson-Boltzmann electrostatics calculations. *Nucleic Acids Res.* **32**, W665–W667 (2004).
